1 **Identification of potential novel combination antibiotic regimens based on drug-**  
2 **susceptibility and genetic diversity of Gram-negative bacteria causing neonatal sepsis in**  
3 **low- and middle-income countries**

4

5 **Authors:** Biljana Kakaraskoska Boceska<sup>1</sup>, Tuba Vilken<sup>1</sup>, Basil Britto Xavier<sup>1,2</sup>, Christine  
6 Lammens<sup>1</sup>, Sally Ellis<sup>3</sup>, Seamus O'Brien<sup>3</sup>, Renata Maria Augusto da Costa<sup>3</sup>, Aislinn Cook<sup>4</sup>, Neal  
7 Russell<sup>4</sup>, Julia Bielicki<sup>4</sup>, Eitan Naaman Berezin<sup>5</sup>, Emmanuel Roilides<sup>6</sup>, Maia De Luca<sup>7</sup>, Lorenza  
8 Romani<sup>7</sup>, Daynia Ballot<sup>8</sup>, Angela Dramowski<sup>9</sup>, Jeannette Wadula<sup>10</sup>, Sorasak Lochindarat<sup>11</sup>,  
9 Suppawat Boonkasidecha<sup>11</sup>, Flavia Namiiro<sup>12</sup>, Hoang Thi Bich Ngoc<sup>13</sup>, Tran Minh Dien<sup>13</sup>, Tim  
10 R. Cressey<sup>14</sup>, Kanchana Preedisripipat<sup>15</sup>, James A. Berkley<sup>16,17,18</sup>, Robert Musyimi<sup>19</sup>,  
11 Charalampos Zarras<sup>20</sup>, Trusha Nana<sup>21</sup>, Andrew Whitelaw<sup>22</sup>, Cely Barreto da Silva<sup>23</sup>, Prenika  
12 Jaglal<sup>24</sup>, Willy Ssengooba<sup>25</sup>, Samir K. Saha<sup>26</sup>, Mohammad Shahidul Islam<sup>26</sup>, Marisa Marcia  
13 Mussi-Pinhata<sup>27</sup>, Cristina Gardony Carvalheiro<sup>27</sup>, Laura Piddock<sup>3</sup>, Surbhi Malhotra-Kumar<sup>1</sup>,  
14 Michael Sharland<sup>4</sup>, Youri Glupczynski<sup>1</sup>, Herman Goossens<sup>1</sup>

15

16 **Affiliations:**

17 <sup>1</sup>Laboratory of Medical Microbiology, Vaccine & Infectious Disease Institute, University of  
18 Antwerp, Antwerp, Belgium

19 <sup>2</sup>STI unit, Department of Clinical Sciences, Institute of Tropical Medicine, Antwerp, Belgium

20 <sup>3</sup>Global Antibiotic Research and Development Partnership (GARDP), Geneva, Switzerland

21 <sup>4</sup>Center for Neonatal and Pediatric Infection & Immunity, St. George's University of London,  
22 London, United Kingdom

23 <sup>5</sup>Pediatric Infectious Diseases Unit, Santa Casa de Sao Paulo, Sao Paulo, Brazil

24 <sup>6</sup>Infectious Diseases Unit, 3rd Dept Pediatrics, School of Medicine, Faculty of Health Sciences,  
25 Aristotle University and Hippokration General Hospital, Thessaloniki, Greece

26 <sup>7</sup>Infectious Disease Unit, Bambino Gesù Children's Hospital, Rome, Italy

27 <sup>8</sup>Department of Pediatrics and Child Health, School of clinical Medicine, Faculty of health  
28 Sciences, University of the Witwatersrand, Johannesburg, South Africa

29 <sup>9</sup>General Pediatrics, Tygerberg Hospital, Cape Town, South Africa

30 <sup>10</sup>Chris Hani Baragwanath Hospital Microbiology Laboratory, National Health Laboratory  
31 Services, Johannesburg, South Africa

32 <sup>11</sup>Queen Sirikit National Institute of Child Health, Bangkok, Thailand

33 <sup>12</sup>Mulago Specialized Women's and Neonatal Hospital, Kampala, Uganda

- 34 <sup>13</sup>Vietnam National Children`s Hospital, Hanoi, Vietnam
- 35 <sup>14</sup>Faculty of Associated Medical Sciences, Chiang Mai University, Chiang Mai, Thailand
- 36 <sup>15</sup>Chiangrai Prachanukroh Hospital, Chiang Rai, Thailand
- 37 <sup>16</sup>Clinical Research Department, KEMRI-Wellcome Trust Research Programme, Kilifi, Kenya
- 38 <sup>17</sup>Centre for Tropical Medicine & Global Health, Nuffield Department of Medicine, University  
39 of Oxford, Oxford UK
- 40 <sup>18</sup>The Childhood Acute Illness & Nutrition (CHAIN) Network, Nairobi, Kenya
- 41 <sup>19</sup>Department of Microbiology, KEMRI-Wellcome Trust Research Programme, Kilifi, Kenya
- 42 <sup>20</sup>Microbiology Department, Hippokraton General Hospital, Thessaloniki, Greece
- 43 <sup>21</sup>Charlotte Maxeke Johannesburg Academic Hospital, Johannesburg, South Africa
- 44 <sup>22</sup>Bristol Medical School, Bristol, United Kingdom
- 45 <sup>23</sup>Infection Control and Prevention Service, Santa Casa de Sao Paulo, Sao Paulo, Brazil
- 46 <sup>24</sup>Department of Medical Microbiology, National Health Laboratory Services, School of  
47 Laboratory Medicine and Medical Science, University of KwaZulu-Natal, Durban, South Africa
- 48 <sup>25</sup>Makerere University, Department of Medical Microbiology, Kampala, Uganda
- 49 <sup>26</sup>Child Health Research Foundation (CHRF), Dhaka Shishu Hospital, Dhaka, Bangladesh
- 50 <sup>27</sup>Department of Pediatrics, Ribeirao Preto Medical School, University of Sao Paulo, Brazil
- 51

52 **Abstract**

53 **Objectives:** Several recent studies highlight the high prevalence of resistance to multiple  
54 antibiotic classes used in current treatment regimens for neonatal sepsis and new treatment  
55 options are urgently needed. We aimed to identify potential new combination antibiotic treatment  
56 regimens by investigating the drug-resistance and genetic profiles of the most frequently isolated  
57 Gram-negative bacteria causing neonatal sepsis in low- and middle-income countries (LMICs)  
58 in the NeoOBS study.

59

60 **Material and methods:** Gram-negative bacteria isolated from neonates with culture-confirmed  
61 sepsis from 13 clinical sites in nine countries, mainly LMICs, were analyzed. Culture-based  
62 identification was followed by whole-genome sequencing (WGS). Minimal inhibitory  
63 concentrations (MICs) for 8 antibiotics were determined for a representative subset of 108  
64 isolates.

65

66 **Results:** Five bacterial species, *Klebsiella pneumoniae* (n=135), *Acinetobacter baumannii*  
67 (n=80), *Escherichia coli* (n=34), *Serratia marcescens* (n=33) and *Enterobacter cloacae* complex  
68 (ECC) (n=27) accounted for most Gram-negative bacterial isolates received (309/420, 74%).  
69 Extended-spectrum  $\beta$ -lactamases (ESBL) genes mostly belonging to CTX-M-15 were found in  
70 107 (79%) *K. pneumoniae* isolates and 13 (38%) *E. coli*, as well as in 6 (18%) and 10 (37%) *S.*  
71 *marcescens* and ECC isolates, respectively. Carbapenem resistance genes were present in 41  
72 (30%) *K. pneumoniae*, while 73 (91%) of *A. baumannii* isolates were predicted to be MDR based  
73 on carbapenem resistance genes. Apart from *A. baumannii*, in which two major pandemic  
74 lineages predominated, a wide genetic diversity occurred at the intraspecies level with different  
75 MDR clones occurring at the different sites. Phenotypic testing showed resistance to the WHO  
76 first- and second- line recommended treatment regimens: 74% of *K. pneumoniae* isolates were

77 resistant to gentamicin and 85% to cefotaxime; *E. coli* isolates showed resistance to ampicillin,  
78 gentamicin and cefotaxime in 90%, 38% and 47%, respectively. For the novel antibiotic regimens  
79 involving different combinations of flomoxef, fosfomycin and amikacin, the overall predicted  
80 MIC-determined susceptibility for Enterobacterales isolates was 71% (n=77) to flomoxef-  
81 amikacin, 76% (n=82) to flomoxef-fosfomycin and 79% (n=85) to fosfomycin-amikacin  
82 combinations, compared to 31% and 22% isolates susceptible to ampicillin-gentamicin and  
83 cefotaxime, respectively. ESBL-producing Enterobacterales isolates were 100% susceptible both  
84 to flomoxef-fosfomycin and flomoxef-amikacin and 92% to fosfomycin-amikacin.

85

86 **Conclusion:** Enterobacterales carried multiple resistance genes to cephalosporins, carbapenems  
87 and aminoglycosides. ESBL-producing *K. pneumoniae* and *E. coli* isolates were highly  
88 susceptible to the three new antibiotic combination regimens planned to be evaluated in the  
89 currently recruiting GARDP-sponsored NeoSep1 trial.

90

91 **Key words:** Gram-negative bacteria, neonatal sepsis, new combination antibiotic regimens,  
92 AMR, low- and middle-income countries (LMICs).

93

## 94 **Introduction/Background**

95 In 2019, more than 560,000 neonatal deaths were associated with bacterial antimicrobial  
96 resistance (AMR), including nearly 140,000 deaths directly attributable to bacterial AMR [1].  
97 The World Health Organization (WHO) reports that over 80% of these sepsis deaths could be  
98 prevented if there was improved treatment and infection prevention [2].  
99 Most of these cases occur in low- and middle-income countries (LMICs) [3]. Of the multiple  
100 large studies recently conducted in these countries [1, 4-6], one systematic review [7] and several  
101 single-site reports [8-10] have shown that Gram-negative bacteria (GNB), such as *Klebsiella*  
102 spp., *Escherichia coli* and *Acinetobacter baumannii*, are considered the main cause of neonatal  
103 sepsis in approximately 40% episodes. Furthermore, these studies have demonstrated that the  
104 empiric treatment of neonatal sepsis currently recommended by WHO, which includes a narrow-  
105 spectrum  $\beta$ -lactam antibiotic in combination with gentamicin as a first line regimen and a 3<sup>rd</sup>  
106 generation cephalosporin as a second line regimen [11], is increasingly compromised by high  
107 drug resistance rates, particularly due to the high prevalence of ESBLs and of aminoglycoside  
108 modifying enzymes (AMEs). Findings from these recent studies extend data from several  
109 previous reports from LMICs where extremely high rates of resistance to amoxicillin (80%),  
110 gentamicin (60%) and third-generation cephalosporins (>80%) were observed [12-17].  
111 The NeoOBS study [6, 18] was a prospective, multicenter, observational cohort study  
112 investigating the management of neonatal sepsis in several countries, aiming to inform and  
113 enhance the design of the currently recruiting Global Antibiotic Research & Development  
114 Partnership (GARDP) - sponsored NeoSep1 antibiotic trial (ISRCTN48721236). The trial is  
115 investigating new antibiotic regimens for the treatment of neonatal sepsis that have activity  
116 against priority neonatal bacterial pathogens and have the potential to be available for wide use  
117 in LMICs.

118 Three generic antibiotics, amikacin, flomoxef and fosfomycin were selected that met the criteria  
119 for consideration in the trial [19], and their potential to be used in novel combined empirical  
120 regimens was assessed by a dynamic hollow-fiber infection model (HFIM) and by checkerboard  
121 assays [20-22]. The three combinations, fosfomycin-amikacin, fosfomycin-flomoxef and  
122 flomoxef-amikacin exhibited synergistic interactions measured by both bactericidal killing and  
123 the prevention of emergence of resistance.

124 The NeoOBS microbiology sub-study aimed to determine the level of antibiotic susceptibility of  
125 MDR Gram-negative bacteria to currently used antibiotics and to the novel drug combinations  
126 included in the NeoSep1 trial.

127

## 128 **Material and Methods**

### 129 Study setting

130 A prospective observational clinical study of neonatal sepsis was conducted between 2018 and  
131 2020 at 19 hospitals across 11 predominantly LMIC countries from five WHO regions (Africa,  
132 America, Europe, Southeast Asia, and Western Pacific) [6]. Hospitalized infants <60 days of age  
133 with an episode of clinically suspected sepsis were eligible for enrollment.

134

### 135 Strain collection and characterization of isolates

136 The Laboratory of Medical Microbiology (LMM) at the University of Antwerp received bacterial  
137 isolates from blood and cerebrospinal fluid (CSF) samples of neonates with culture-confirmed  
138 sepsis from 13 participating sites in 9 countries (Supplementary Table 1). LMM did not obtain  
139 bacterial isolates from 3 sites from India and 3 from China. All the participating sites followed a  
140 well-established microbiological protocol for collection, storage and shipment of the isolates to  
141 the central laboratory [18]. At LMM, species identification was verified using Microflex LT  
142 MALDI-TOF MS (Bruker Daltonics) and the MALDI Biotyper IVD reference library (2021).

143

144 Selection of the isolates for inclusion in this microbiology study

145 Identification at species level was confirmed by WGS for 723 out of 1051 bacterial isolates.  
146 Gram positive were 303 (Coagulase-negative staphylococci (n=254) and *Staphylococcus aureus*,  
147 n=49), and 420 were Gram-negative, belonging to 23 different species. Enterobacterales,  
148 comprising *Klebsiella pneumoniae* (n=135), *Escherichia coli* (n=33), *Serratia marcescens*  
149 (n=34) and *Enterobacter cloacae* complex (n=27), as well as *Acinetobacter baumannii* (n=80)  
150 as non-fermenters, were the most common pathogens, together accounting for nearly three-  
151 quarters of Gram-negative isolates. The focus of this study was limited to Gram-negative  
152 bacteria.

153 For all analyses, the patient's first clinical isolate from blood or CSF was selected. In case of  
154 mixed infection, isolates belonging to different species were also included. To avoid analyzing  
155 replicates of the same bacterial clone, only isolates displaying different genetic profiles were  
156 selected for *in vitro* susceptibility testing. Isolates belonging to a given species for which less  
157 than 20 isolates were obtained were not further analyzed.

158

159 DNA isolation and Whole Genome Sequencing (WGS)

160 Genomic DNA isolation was done using the MasterPure complete DNA and RNA purification  
161 kit (Epicentre, Madison, WI, USA). Library and sample preparation were performed using  
162 Nextera XT sample preparation kit (Illumina) and for sequencing MiSeq (Illumina Inc., USA)  
163 was used. The raw data of the sequenced strains were quality checked and trimmed using  
164 trimmomatic v0.4.2. The second analysis was performed using BacPipe v.1.2.6 [23]. Built-in  
165 tools and databases were used for *de novo* assembly SPAdes (v.3.11.0) and Prokka (v1.11.1) for  
166 annotation. Assembled contigs were quality checked using checkM [24]. MLST for *E. coli* [25],  
167 *K. pneumoniae* [26], *Enterobacter* spp. [27] and *Acinetobacter* spp. [28] were determined

168 according to MLST schemes of organism-specific reference databases. For core genome  
169 multilocus sequence typing (cgMLST), a gene-by-gene approach was utilized by developing a  
170 custom scheme for the specific study, assessing allelic loci distances using ChewBBACA [29].  
171 Clonal relatedness was defined as  $\leq 10$  allelic differences between isolates for *A. baumannii* [29]  
172 and  $< 12$  for *Klebsiella* spp. [30]. Trees were visualized using Grapetree [31]. For strains for  
173 which phenotypic MIC susceptibility testing was not performed, the presence of one or more  
174 resistance genes to the tested antibiotics was used to reflect resistance.

#### 175 *In vitro* susceptibility testing

176 Eighty-seven *K. pneumoniae* and 21 *E. coli* isolates representing different genetic profiles were  
177 tested against first- and second- line WHO-recommended regimens (ampicillin, gentamicin and  
178 cefotaxime), as well as piperacillin-tazobactam, meropenem and three antibiotics (flomoxef,  
179 amikacin and fosfomycin) that are under investigation as a potential new regimen in combination.  
180 The activity of fosfomycin was assessed by agar dilution method. All tests were performed  
181 according to the latest guidelines of the EUCAST susceptibility testing standards and  
182 interpretation criteria ([https://www.eucast.org/clinical\\_breakpoints](https://www.eucast.org/clinical_breakpoints)).

183 For flomoxef, in the absence of formal EUCAST/CLSI clinical breakpoint, we used an MIC  
184 susceptibility breakpoint of  $\leq 1$  mg/L, based on a large retrospective study in patients with  
185 bacteremia due to ESBL producers, which reported a more favorable clinical outcome in patients  
186 treated with flomoxef when isolate MICs were  $\leq 1$  mg/L compared to those with MICs  $\geq 2$  mg/L  
187 [32].

188 The susceptibility of the isolates to the proposed combination regimens was analyzed based on  
189 the novel combination breakpoint thresholds determined by HFIM model and checkerboard  
190 assays [20-22]. If flomoxef MIC values are between 1 and 32 mg/L, combination with  
191 fosfomycin or amikacin extends flomoxef's spectrum of activity, but only when MIC of the  
192 associated drug is in the range of the corresponding MIC breakpoints, i.e.  $\leq 32$  mg/L for



193 fosfomycin and  $\leq 16$  mg/L for amikacin [20, 21]. Success of fosfomycin-amikacin combination  
194 is predicted if the product of the two individual antibiotic MICs is  $\leq 256$  mg/L [R. da Costa,  
195 personal communication, August 31, 2023].

196

## 197 Results

198 In total, 420 Gram-negative bacterial isolates were received. The five most common identified  
199 species were: *K. pneumoniae* (n=135), *A. baumannii* (n=80), *E. coli* (n=34), *S. marcescens*  
200 (n=33) and *Enterobacter cloacae* complex (ECC) (n=27). These 309 Gram-negative isolates  
201 were obtained from 295 patients. The remaining 111/420 GNB isolates belonged to 18 different  
202 bacterial species were represented by less than 20 isolates each. The distribution of the five major  
203 GNB isolates per sites is shown in Figure 1.

204

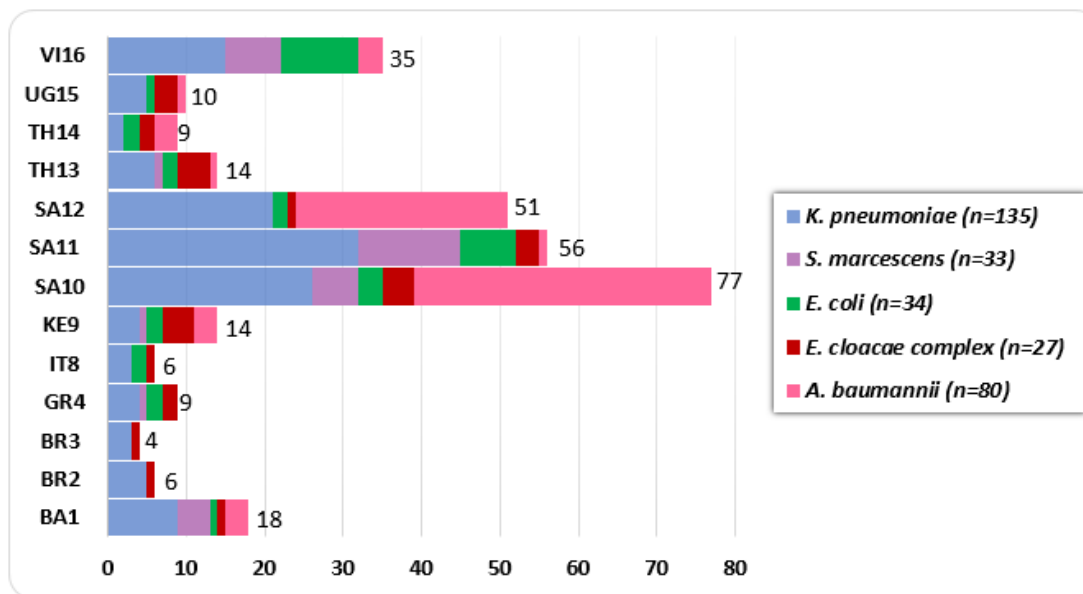

205

206 **Figure 1. Distribution of the total number (indicated next to the bars) of the five most common GNB**  
207 **species analyzed by site.**

208 (n=309, one isolate per species per patient only, following removal of duplicates).

209 (number of isolates correlates with the number of neonates, except for the following sites: TH13  
210 (13 neonates - 14 isolates), SA12 (46 neonates - 51 isolates), SA11 (51 neonates - 56 isolates),  
211 SA10 (75 neonates - 77 isolates) and BR2 (5 neonates - 6 isolates)).

212

### 213 **Antibiotic susceptibility testing and resistance mechanisms**

214 Ampicillin/gentamicin regimen had low rates of coverage, with 32% (34/108) of the isolates  
215 susceptible, and only 22% (24/108) susceptible to cefotaxime (Supplementary Table 2).

216 *K. pneumoniae* was the species with highest rates of resistance due to the high prevalence of  
217 ESBLs and of AMEs, found in 74% (64/87) and 63% (55/87) of the isolates, respectively. The  
218 rates of susceptibility to piperacillin-tazobactam differed between *K. pneumoniae* (35%) and *E.*  
219 *coli* (67%) due to the frequent occurrence of the *bla*<sub>OXA-1</sub> gene among *K. pneumoniae* isolates.

220 Carbapenem resistance was almost exclusive to *K. pneumoniae*, with 30% (26/87) strains  
221 resistant to meropenem versus 5% (1/21) of *E. coli*. The most prevalent carbapenem resistance  
222 genes were NDM-like (81%; n=21/26), followed by OXA-48-like (11%; n=3/26).

223 Susceptibility rates to flomoxef (71%) and amikacin (70%) were comparable to those observed  
224 for meropenem (75%) in the subset of 108 isolates with available MIC results. Flomoxef  
225 displayed good activity against ESBL-producing Enterobacterales (ESBL-PE) and resistance to  
226 this agent was due to class C  $\beta$ -lactamases and carbapenemases. Among the aminoglycosides,  
227 amikacin showed the best activity against ESBL-PE, since it was not affected by common AMEs  
228 (AAC(3)-II, ANT(2')-I), which are known to modify gentamicin. Fosfomycin showed the  
229 strongest antibacterial activity with 90% of the phenotypically tested isolates being susceptible  
230 to this antibiotic. An almost perfect match (106/108) was found between susceptibility and  
231 resistance phenotypes and genotypes for all beta-lactams, including broad-spectrum penicillins,  
232 cephalosporins and carbapenem drugs, as well as for aminoglycosides. All ESBLs, AmpC and  
233 carbapenem resistance genes detected by genotyping correctly predicted strain susceptibility  
234 patterns, except for one *K. pneumoniae* isolate carrying the *bla*<sub>NDM-1</sub> gene but found to be

235 susceptible to meropenem (MIC of 0.06 mg/L). For aminoglycosides, all strains carrying  
236 resistance genes coding for modifying enzymes to gentamicin and/or to amikacin were confirmed  
237 as resistant to these drugs by MIC testing. All strains coding for 16S rRNA methylase genes  
238 displayed high level resistance to gentamicin and to amikacin (MIC > 256 mg/L for both agents).  
239 One *K. pneumoniae* isolate displayed high-level resistance to amikacin (MIC >256 mg/L) but  
240 did not contain a resistance gene that accounts for resistance to amikacin. Among the 11  
241 fosfomycin-resistant strains, only two carried the gene encoding the fosfomycin-modifying  
242 enzyme (*fosA3* in one *E. coli* isolate with a fosfomycin of MIC >512 mg/L and *fosA5* in one *K.*  
243 *pneumoniae* isolate with an MIC of 64 mg/L). Besides *fosA3* and *fosA5*, genes coding other  
244 fosfomycin-modifying enzymes (*fosB*, *fosC*, *fosX*) were not found in the resistant strains. Also,  
245 no mutations of cell-wall transport systems (*glpT* and *uhpT*), their respective regulatory genes  
246 (*cyaA* and *ptsI*) nor *murA* targets were present in any of these strains.  
247 The rates of susceptibility to the proposed new regimens were assessed using the novel  
248 combination breakpoint thresholds determined by HFIM assays [20-22]. For Enterobacterales  
249 isolates for which MIC determination was performed, prediction of susceptibility to at least one  
250 antibiotic combination was 77/108 (71%) isolates for flomoxef-amikacin, 85/108 (79%) for  
251 fosfomycin-amikacin and 82/108 (76%) for flomoxef-fosfomycin compared to 34/108 (31%) for  
252 ampicillin-gentamicin and 24/108 (22%) for cefotaxime (Table 1 and Supplementary Table 2).  
253 The three new combinations exhibited strong activity against ESBL-producing *E. coli* and *K.*  
254 *pneumoniae* isolates (excluding those strains producing an AmpC cephalosporinase and  
255 carbapenemase in addition to ESBL) and an excellent coverage with flomoxef-amikacin and  
256 flomoxef-fosfomycin of 100% (n=52/52) and 92% (n=48/52) with fosfomycin-amikacin  
257 combinations.  
258

259 **Table 1. Susceptibility of 108 Enterobacterales isolates to different combination regimens**  
 260 **based on the novel combination breakpoint thresholds [20-22]**

| Enterobacterales* isolates tested for MIC determination                                     | FOS <sup>°</sup> /FLX <sup>°</sup> FOS/AMK <sup>°</sup> FLX/AMK<br>N (% coverage) |         |          |
|---------------------------------------------------------------------------------------------|-----------------------------------------------------------------------------------|---------|----------|
| <b>Cefotaxime-S (n=24)</b><br><i>ESBL-neg Enterobacterales</i>                              | 24 (100)                                                                          | 23 (96) | 24(100)  |
| <b>Cefotaxime-R/meropenem-S (n=58)</b><br><i>ESBL-pos/Carba-Neg Enterobacterales (n=52)</i> | 55 (95)                                                                           | 52 (90) | 53 (91)  |
| <i>AmpC-pos/Carba-Neg Enterobacterales (n=6)</i>                                            | 52 (100)                                                                          | 48 (92) | 52 (100) |
| <b>Meropenem-R (n=26)</b><br><i>Carba-Pos Enterobacterales**</i>                            | 3 (50)                                                                            | 4 (67)  | 1 (17)   |
|                                                                                             | 3 (12)                                                                            | 10 (38) | 0 (0)    |
| <b>Total number of isolates (n=108)</b>                                                     | 82 (76)                                                                           | 85 (79) | 77 (71)  |

261 \* *Klebsiella pneumoniae* (n=87), *Escherichia coli* (n=21)

262 <sup>°</sup> FOS: fosfomycin, FLX: flomoxef, AMK: amikacin

263 \*\* Among the 26 meropenem-resistant, carbapenemase-producing Enterobacterales isolates, 21  
 264 were concomitantly ESBL-producing and 5 were ESBL-negative.

265

266 Susceptibility of *S. marcescens* and ECC was predicted by the presence of resistance genes. Both  
 267 species harbored genes coding for inducible chromosomal AmpC and displayed resistance to  
 268 cefotaxime, as well as to flomoxef alone. In addition, genes coding for ESBLs were observed in  
 269 6/33 (18%) of *S. marcescens* and 10/27 (37%) of ECC isolates. Resistance to gentamicin was  
 270 predicted in 4/33 (12%) of *S. marcescens* and in 10/27 (37%) of ECC.

271 The activity of amikacin was predicted to cover 91% of *S. marcescens* and 96% of ECC isolates,  
 272 since genes coding for AMEs or for 16SrRNA methylase genes that confer resistance to this  
 273 antibiotic were not widespread. Carbapenem resistance was predicted to be low, as only one  
 274 isolate per species was found to carry an NDM-like gene.

275 Among *A. baumannii* isolates, 91% (73/80) harbored OXA-like carbapenemase genes (mostly  
 276 OXA-23 and OXA-58) and 45% (36/80) co-harbored NDM-1 always in association with OXA-

277 23, as well as resistance genes to several other classes of antimicrobials, including the 16S rRNA  
278 methylase genes, that confers high-level resistance to all aminoglycosides for clinical use.

279

## 280 **Characterization of *Klebsiella pneumoniae***

281 *K. pneumoniae* isolates were found in all 13 sites, and WGS analysis revealed high genetic  
282 diversity with a total of 56 different sequence types (STs) found among the 135 isolates obtained.  
283 Fifty-seven isolates belonging to 12 STs were predicted to be MDR, based on the presence of  
284 acquired drug resistance genes to 3 or more classes of antimicrobial agents. These MDR *K.*  
285 *pneumoniae* clones were isolated at all sites but with different geographic distribution of STs  
286 (Table 2). For instance, the predominant STs in South African sites were ST39, ST17 and ST14,  
287 while ST15 and ST147 were found in Vietnam and Bangladesh, respectively. As illustrated in  
288 Table 2, *K. pneumoniae* belonging to different STs were often co-circulating at different sites.

289

290

291

292

293

294

295

296

297

298 **Table 2. Distribution of the 12 most prevalent MDR STs of *K. pneumoniae* by site.**

299

| Site         | Sequence types* |           |          |          |          |          |          |          |          |          |          | Total    |           |
|--------------|-----------------|-----------|----------|----------|----------|----------|----------|----------|----------|----------|----------|----------|-----------|
|              | ST39            | ST17      | ST14     | ST307    | ST37     | ST11     | ST147    | ST15     | ST101    | ST14-1LV | ST15-1LV |          | ST20      |
| BA1          | 1               |           |          |          |          | 1        | 3        |          | .        |          | 1        |          | 6         |
| BR2          |                 |           |          |          |          | 2        |          |          |          |          |          |          | 2         |
| BR3          |                 |           |          |          |          |          |          |          |          |          |          |          | 0         |
| GR4          |                 |           |          |          | 1        |          |          |          |          |          |          |          | 1         |
| IT8          |                 |           |          |          |          |          |          |          |          |          |          |          | 0         |
| KE9          |                 | 1         |          |          |          |          |          |          |          |          |          |          | 1         |
| SA10         |                 |           | 3        |          | 1        |          |          |          |          |          |          |          | 4         |
| SA11         | 12              | 3         | 1        |          |          |          |          |          |          |          |          |          | 16        |
| SA12         | 1               | 7         | 5        | 2        |          |          |          |          |          |          |          |          | 15        |
| TH13         |                 | 1         |          | 2        |          |          |          |          |          |          |          |          | 3         |
| TH14         |                 |           |          |          |          |          |          |          |          |          |          |          | 0         |
| UG15         |                 |           |          | 1        | 1        |          |          |          |          | 1        |          |          | 3         |
| VI16         |                 |           |          |          | 1        |          |          | 3        | 1        |          |          | 1        | 6         |
| <b>Total</b> | <b>14</b>       | <b>12</b> | <b>9</b> | <b>5</b> | <b>4</b> | <b>3</b> | <b>3</b> | <b>3</b> | <b>1</b> | <b>1</b> | <b>1</b> | <b>1</b> | <b>57</b> |

300

301 \*The presence of more than one isolate belonging to the same sequence type at a given site  
 302 indicates clonal spread

303

304 CgMLST revealed that isolates of the same ST found at different sites could be delineated in  
 305 different clones (Figure 2). This analysis had, as expected, a much higher discriminatory power  
 306 than classical multilocus sequence typing and it allowed the detection of distinct clones within a  
 307 single ST, most notably for ST39, ST14 and ST17.

308

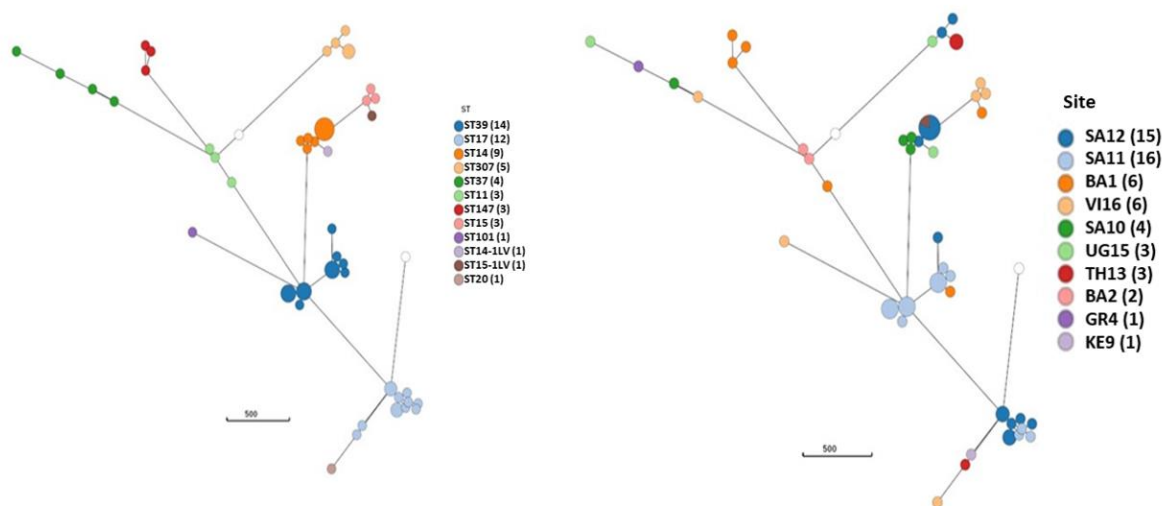

309

310 **Figure 2. Minimum spanning tree of cgMLST analysis of MDR clones of *K. pneumoniae***  
311 **(n=57) showing specific local site clustering.**

312 Left: ST based clustering Right: Site based clustering. The white circles represent public  
313 references.

314

315 In total, 83% (112/135) of *K. pneumoniae* isolates carried one or several ESBL genes encoding  
316 resistance to extended spectrum cephalosporins; this was confirmed phenotypically for 65/87  
317 isolates (44 ESBL only and 21 in association with carbapenamase) tested phenotypically. ESBL  
318 coding genes were widely distributed and found in isolates from 12/13 sites; the *bla*<sub>CTX-M-15</sub> gene  
319 was the most prevalent ESBL, present in 96 isolates at 10 sites. Other less frequently found ESBL  
320 genes were *bla*<sub>CTX-M-14</sub> (in 7 isolates), *bla*<sub>CTX-M-27</sub> (in 2 isolates) both at site VI16 in Vietnam,  
321 *bla*<sub>SHV</sub> (in 5 isolates) and *bla*<sub>TEM</sub> (in 2 isolates).

322 On the contrary, only six isolates carried AmpC genes, *bla*<sub>MOX-2</sub> (n=3, site GR4) and *bla*<sub>DHA-1</sub>  
323 (n=3 from BA1, TH13 and VI16).

324 All strains with carbapenamase coding genes were phenotypically resistant. These strains were  
325 found at 7 sites across five countries (Figure 3). The most frequent carbapenam resistance gene  
326 was *bla*<sub>NDM</sub> being identified in 31/135 (23%) of *K. pneumoniae* isolates. Among the different

327 variants, *bla*<sub>NDM-1</sub> was the most prevalent (n=20) but other alleles (*bla*<sub>NDM-4</sub> and *bla*<sub>NDM-5</sub>) were  
328 also found. As known from the epidemiology of carbapenemase producers, specific carbapenem  
329 resistance genes were associated with the geographic areas in which the isolates were found.  
330 Despite the small number of isolates, KPC producing strains were mostly found in Brazil, those  
331 carrying OXA-48-like carbapenemase in Bangladesh (BA1) and South Africa (SA11) and those  
332 with NDM-4 and NDM-5 in South-East Asia (VI16) and Asia (BA1) (Figure 3).  
333

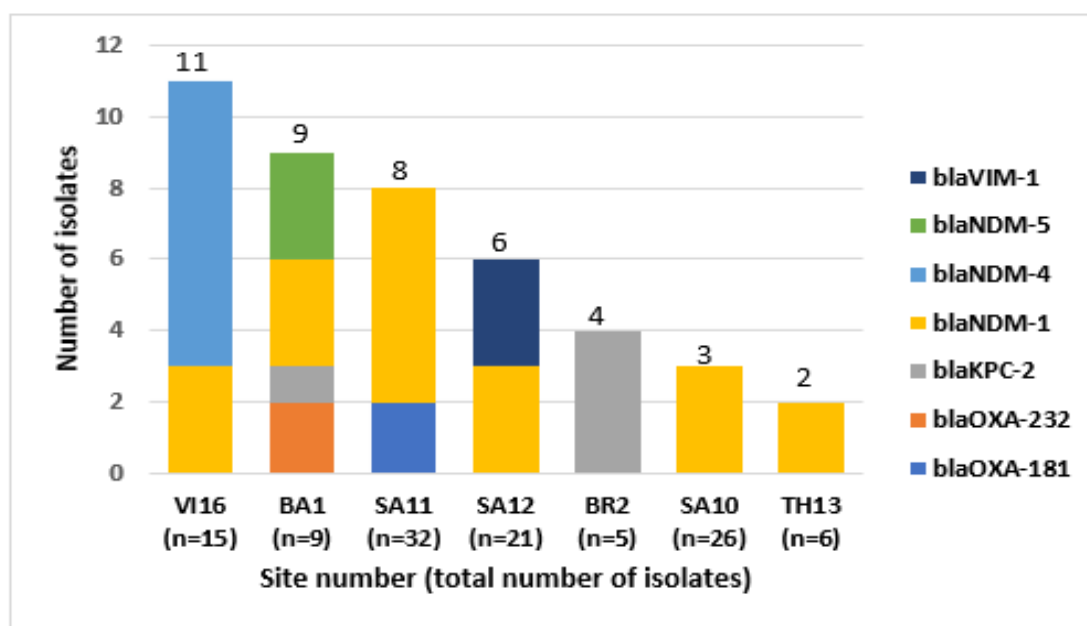

334

335 **Figure 3. Distribution of carbapenem resistance genes of *K. pneumoniae* isolates (n=135)**

336 **by site.**

337 (n) = total number of *K. pneumoniae* isolates per site. Sites that collected *K. pneumoniae* isolates  
338 lacking any carbapenem resistance genes are not shown in this figure (UG15 n=5, GR4 n=4, KE9  
339 n=4, IT8 n=3, BR3 n=3 and TH14 n=2).

340

341 Acquired aminoglycoside resistance genes were found in 122/135 (90%) *K. pneumoniae* isolates  
342 (Figure 4), usually in association with ESBL- and/or with carbapenemase-coding genes. In  
343 particular the *aac(3)-II* genes which confers resistance to gentamicin, were frequently present  
344 (n=90; 67%), most often in association with *bla*<sub>CTX-M-15</sub> ESBL gene (n=78). Other genes like



345 *aph(3')-VI* that are known to be associated with resistance to amikacin were less frequent and  
 346 found only in 6 isolates at three sites, BA1, GR4 and IT8 (n=2 each). Genes coding for 16S rRNA  
 347 methylases (*armA*, *rmtB*, *rmtC*, *rmtF*), which are known to confer resistance to all clinically used  
 348 aminoglycosides, were identified in 23 isolates from 5 sites (BA1, SA10, SA11 SA12 and VI16)  
 349 (Figure 4). The 16S rRNA methylase genes were carried only by carbapenemase-producing  
 350 isolates, mostly NDM-producers.  
 351

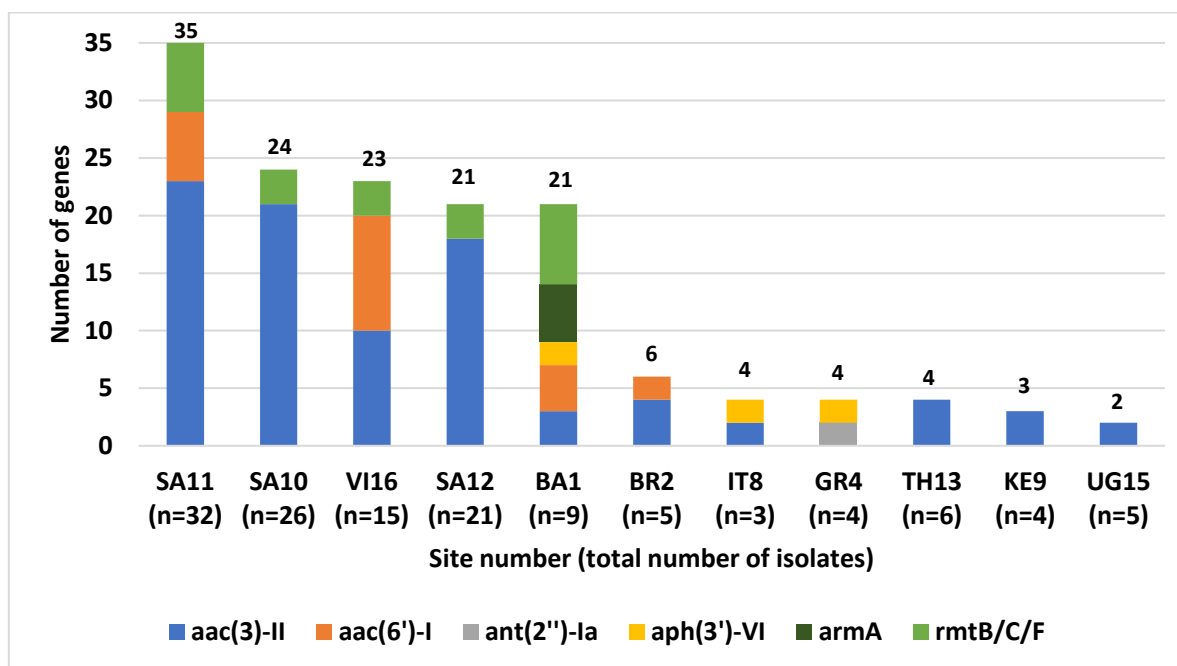

352

353 **Figure 4. Distribution of aminoglycoside resistance genes of *K. pneumoniae* isolates (n=135) by site.**

354 (n) = total number of *K. pneumoniae* isolates per site found. Two sites that collected *K.*  
 355 *pneumoniae* isolates (BR3 n=3 and TH14 n=2) but without aminoglycoside resistance genes  
 356 being detected are not represented in this figure. Several isolates were carrying more than one  
 357 resistance gene to a given class of antimicrobial agents. Other aminoglycoside resistance genes:  
 358 *aadA*, *aph(6')-I* (streptomycin resistance) and *aph(3')-I* (neomycin/kanamycin resistance) were  
 359 very frequent but are not represented in this figure due to their lack of clinical relevance in  
 360 humans.

361

362 **Characterization of *E. coli***

363 Thirteen different *E. coli* STs were identified. ST1193 (n=13, 38%) was the most abundant in  
364 isolates from Vietnam (VII6, n=5) and one site in South Africa (SA11, n=4). The second most  
365 prevalent ST type was ST131 (n=5, 15%), reported from two sites in South Africa (SA10, n=1  
366 and SA12, n=2), Thailand (TH13, n=1) and Vietnam (VI16, n=1).

367 Compared to *K. pneumoniae*, *E. coli* isolates carried fewer antibiotic resistance genes. Thirty-  
368 eight percent of the isolates (13/34) harbored an ESBL gene, mostly *bla*<sub>CTX-M-27</sub> (n=8) and *bla*<sub>CTX-</sub>  
369 *M-15* (n=5) genes. Only one isolate carried a *bla*<sub>KPC-2</sub> carbapenem resistance gene (site VI16) and  
370 one with AmpC gene (*bla*<sub>CMY-2</sub>, site TH13).

371 Aminoglycoside resistance genes were detected in 9 *E. coli* isolates from 5 sites. Genes encoding  
372 AMEs modifying only gentamicin (*aac(3)-II* and *ant(2')-Ia*) were observed in 7 isolates and were  
373 found in association with ESBL genes mostly in ST131 or in ST1193. Furthermore, two *E. coli*  
374 strains from site VII6 carried the *rmtB* 16S RNA methylase gene leading to resistance to all  
375 aminoglycosides including amikacin.

376

### 377 **Characterization of *A. baumannii***

378 In *A. baumannii*, 13 different sequence types were identified, with two of them predominant:  
379 ST1 (n=36) and ST2 (n=24). These two STs represent the two major international pandemic  
380 lineages, GC1 and GC2, respectively. Two sites from South Africa (SA10 and SA12) accounted  
381 for 80% of the *A. baumannii* isolates. Two different clusters could be delineated within ST1 and  
382 ST2 each (Figure 5). While the ST2 strains were grouped in two distinct clusters and differed  
383 between sites SA10 and SA12, the ST1 strains of these two sites were also grouped in two  
384 different clusters, but closely related to each other with a small allelic loci distance (Figure 5).  
385 Other sporadic STs not associated with pandemic lineages were found at single sites.

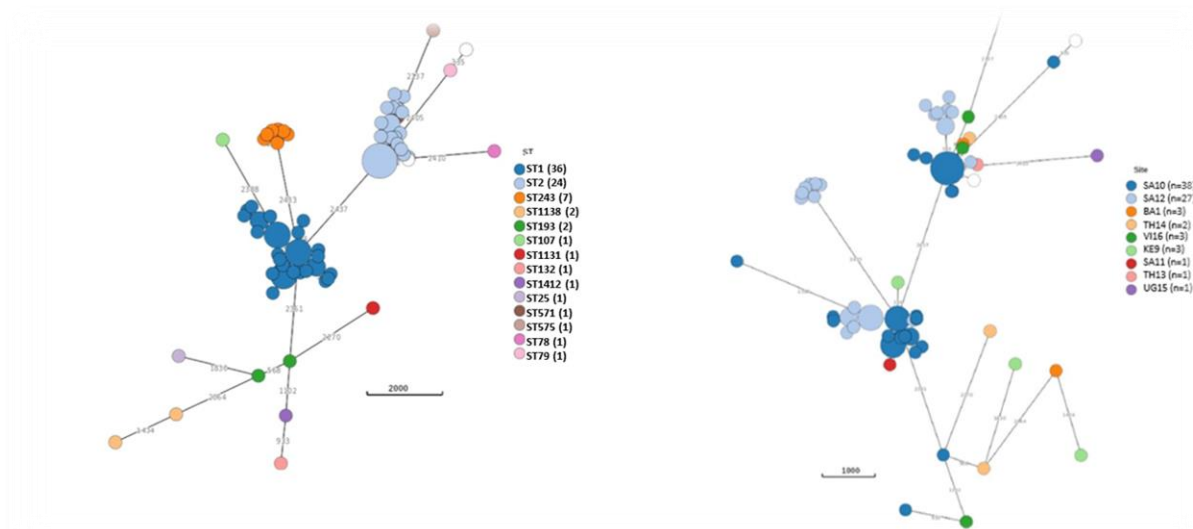

386

387 **Figure 5. Minimum spanning tree from *A. baumannii* genomes (n=80) by cgMLST**  
388 **sequence types (STs).**

389 Left: The MLST groups (Pasteur scheme). Right: The sequence type diversity by site. White  
390 circles indicate the public references.  
391

392 *A. baumannii* isolates displayed a very extensive drug resistance profile. Carbapenemase-  
393 producing *A. baumannii* isolates were found in 8 sites in 5 countries in Asia and Africa (Figure  
394 6). *Bla<sub>OXA23</sub>* was the most frequently present carbapenem resistance gene, present in 64/80 (80%)  
395 of the isolates and nearly half of the OXA-23-producers (n=36; 45%) co-carried *bla<sub>NDM-1</sub>*. Ten  
396 isolates (13%), seven of which from site SA12, were carrying a *bla<sub>OXA-58</sub>* gene (Figure 6). All  
397 ST1 isolates from sites SA10, SA11 and SA12 in South Africa always carried the *bla<sub>NDM-1</sub>* and  
398 *bla<sub>OXA-23</sub>* genes. On the other hand, strains belonging to ST2 carried *bla<sub>OXA-23</sub>* alone and never in  
399 association with *bla<sub>NDM-1</sub>*. Most of the *bla<sub>OXA-58</sub>* positive isolates (n=10) were associated with  
400 ST243 and were found almost exclusively at site SA12 (n=7; 70%).

401

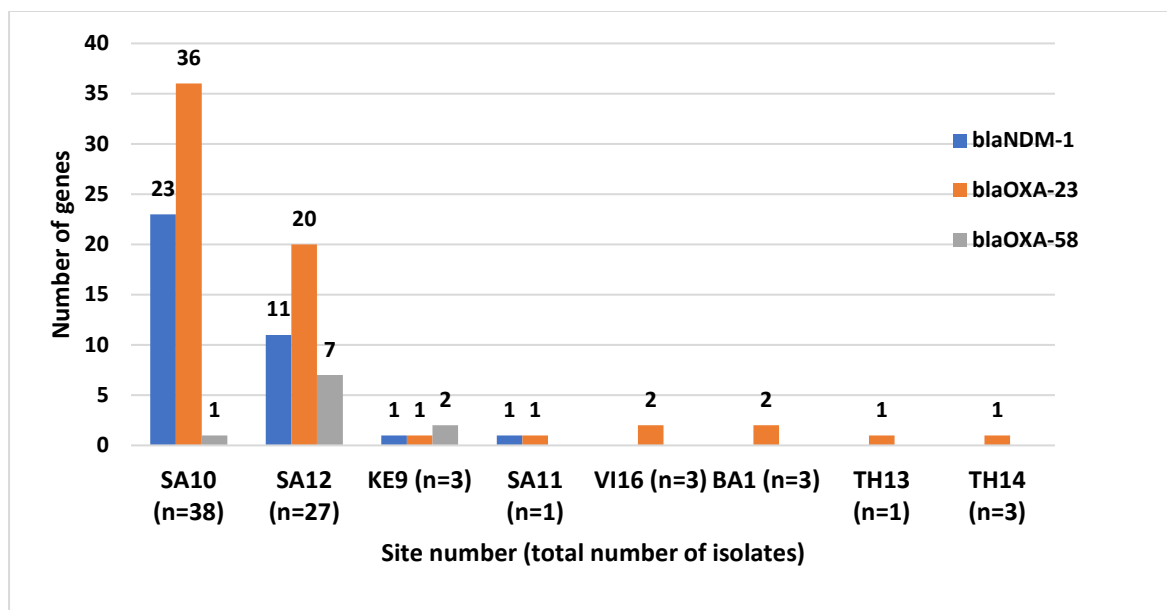

402

403 **Figure 6. Distribution of carbapenem resistance genes in *A. baumannii* isolates (n=80) by site.**

404 Site UG15 (n=1) not represented in the chart since one unique *A. baumannii* isolate lacking any  
405 acquired carbapenemase producing genes.

406

407 More than 90% (74/80) of the *A. baumannii* isolates harbored one or several resistance  
408 mechanisms to all aminoglycosides including amikacin (Figure 7). The *armA* rRNA 16S  
409 methylase gene (in 53/80 strains, 62%) often in association with *aac(3)-Ia* (in 35/80 strains,  
410 44%), was the most common aminoglycoside resistance mechanism.

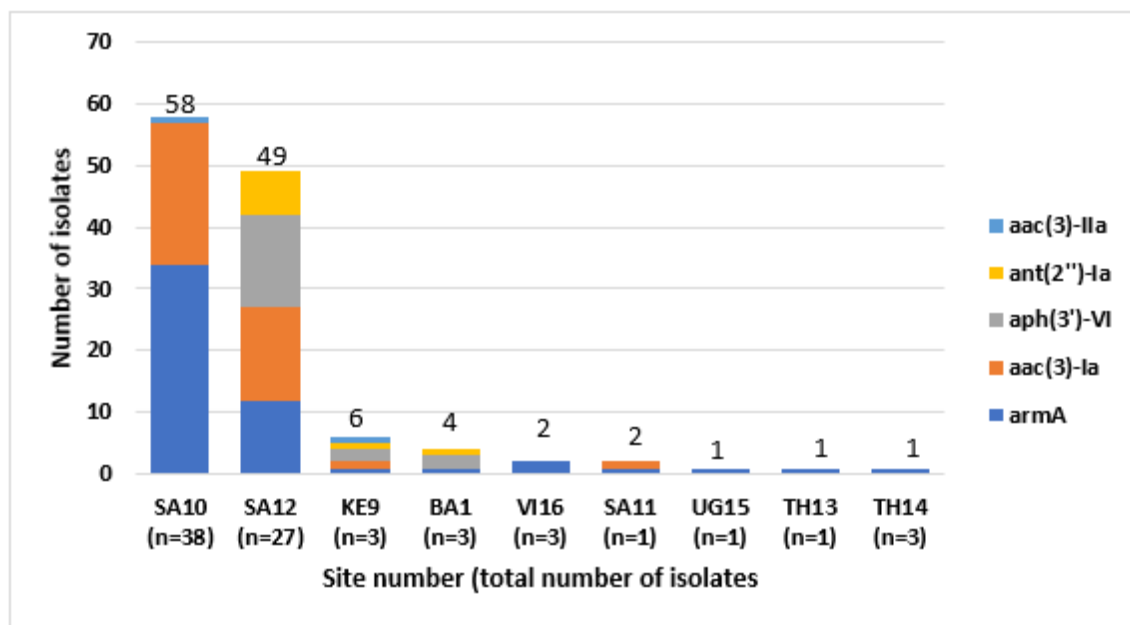

411

412 **Figure 7. Distribution of aminoglycoside resistance genes of *A. baumannii* isolates (n=80)**  
413 **per site.**

414 (n) = total number of *A. baumannii* isolates collected per site. *aph(3')-VI* (n=2) and *aph(3')-VIa*  
415 (n=17) grouped together. Several isolates were carrying more than one resistance gene to a  
416 given class of antimicrobial agents.

417

#### 418 **Characterization of *Enterobacter cloacae* complex (ECC)**

419 ECC isolates (n=27) were collected at 12 sites in 8 countries with different subspecies occurring  
420 at the different sites. *E. hormaechei* (n=15) was the most common species found at 8 sites; *E.*  
421 *roggenkampii* (n=4) at two and *E. asburiae* (n=3) at 3 sites. Antimicrobial resistance in ECC is  
422 partly due to intrinsic chromosomal genes. All strains had in their core genome different alleles  
423 of *bla<sub>ACT</sub>*, an intrinsic AmpC gene that when overexpressed leads to resistance to expanded  
424 spectrum cephalosporins.

425 Multiple acquired resistance genes were found in 10/27 (37%) of the ECC isolates. All of these  
426 multidrug resistant strains were identified genetically as *E. hormaechei*. These strains belong to

427 five different ST types including the well-known ST68 and ST78 MDR lineages. Nine of the 10  
428 ESBL-producing *E. hormaechei* isolates carried a *bla*<sub>CTX-M-15</sub> and one a *bla*<sub>SHV-12</sub> gene. Other  
429 resistance genes that were frequently found in association with ESBLs were *bla*<sub>OXA-1</sub> gene  
430 (resistance to piperacillin-tazobactam) and *aac(3)-II* coding genes (resistance to gentamicin).  
431 One of the 10 strains collected at site BA1 was also carrying a *bla*<sub>NDM-1</sub> gene and a *rmtB* 16S  
432 rRNA methylase gene rendering it almost pan-resistant.

433

#### 434 **Characterization of *Serratia marcescens***

435 Thirty-three *Serratia marcescens* isolates were collected from 7 sites in 6 countries, majority  
436 (n=19; 58%) from the two South African sites. The cgMLST analysis highlighted the diversity  
437 of the *S. marcescens* isolates, between the different sites but also within single sites.

438 Genes coding for ESBLs, *bla*<sub>VEB-5</sub> (n=2), *bla*<sub>CTX-M-14</sub> (n=2) and *bla*<sub>CTX-M-15</sub> (n=2) were found in 6  
439 (18%) isolates in Vietnam (n=3), Bangladesh (n=2), and Thailand (n=1). One isolate from  
440 Vietnam harbored a *bla*<sub>NDM-5</sub> carbapenem resistance gene.

441 16S rRNA methylase genes (*armA* (n=2); *rmtB* (n=1)) were found in three isolates at two sites,  
442 BA1 and VI16.

443

#### 444 **Discussion**

445 Three generic antibiotics, flomoxef, amikacin and fosfomycin, were evaluated in novel  
446 combinations as new empiric carbapenem-sparing regimens for the treatment of neonatal sepsis,  
447 exhibited very good activity against the majority of these Enterobacterales isolates. The NeoOBS  
448 clinical study documented Gram-negative bacteria as the most common causative pathogens in  
449 neonatal sepsis [6], which is consistent with recent literature in LMICs [33]. The most frequently  
450 isolated species were *K. pneumoniae* and *A. baumannii*, a finding which is also in line with data

451 by others from several single and multicenter studies of neonatal sepsis in LMICs [4, 5, 7, 9, 34-  
452 36]. *A. baumannii* isolates were predicted to be extremely drug-resistant as they harbored a large  
453 array of genes conferring resistance to almost all classes of antibiotics, leaving colistin as the  
454 only therapeutic option for neonatal sepsis caused by this organism. Among Enterobacterales,  
455 resistance to  $\beta$ -lactams was due to the widespread distribution of ESBLs, especially among *K.*  
456 *pneumoniae* (79%) and *E. coli* (38%) isolates. Piperacillin-tazobactam, that provides partial  
457 ESBL/pseudomonal coverage and was commonly used as empirical treatment by some hospitals  
458 [6], had moderate antibacterial activity against *E. coli* (susceptibility of 67%) but low activity  
459 against *K. pneumoniae* (susceptibility of 35% only), due to the widespread distribution of *bla*<sub>OXA-1</sub>.  
460 These high rates of antimicrobial resistance have been translated to the increased use of  
461 meropenem for treatment of these patients with sepsis at these sites. However, in this study  
462 resistance to meropenem was also observed in approximately 30% of *K. pneumoniae* isolates.

463 All isolates in this study showed wide genetic diversity, especially *K. pneumoniae* isolates, with  
464 56 different STs in 135 isolates. Multidrug resistant strains belonged to different lineages and  
465 clones. Most of these isolates belong to multidrug-resistant international lineages that are already  
466 widely reported in both adults and neonates, and are known to be associated with nosocomial  
467 outbreaks and endemic hospital settings [37-39]. Besides their ability to spread through clonal  
468 expansion, these MDR lineages are also known to carry several plasmids, transposons and other  
469 mobile genetic elements that allow them to acquire and spread antimicrobial resistance within  
470 and across different bacterial species [40].

471 In *E. coli*, ST131 and ST1193 accounted as the most frequent STs in the NeoOBS study. This is  
472 in line with a recent epidemiological study which found that next to ST131, ST1193 is the second  
473 most widely globally distributed MDR clone recorded to date [41]. Interestingly, we found that  
474 *E. coli* ST1193 was also largely distributed in different sites from Vietnam to Kenya, Uganda  
475 and South Africa, highlighting the expansion of this lineage also on the African continent.

476 Multi-drug resistant *A. baumannii* strains were unevenly distributed at 8 sites, but found in large  
477 numbers at only two of the participating sites (SA10 and SA12).

478 *A. baumannii* has emerged during the last decade as a major difficult to treat nosocomial bacterial  
479 pathogen which is often linked with outbreaks or endemic contexts in healthcare settings. Once  
480 established, this organism can persist in the healthcare environment and is extremely difficult to  
481 eradicate [42]. Unlike *K. pneumoniae* and *E. coli* which showed high genetic diversity, *A.*  
482 *baumannii* isolates were less diverse and mostly belonged to the two dominant pandemic  
483 international clonal groups (CG1 and CG2) known to occur in a limited number of sites, mostly  
484 in South Africa.

485 Susceptibility of *S. marcescens* and ECC was inferred from genotyping of resistance genes. Both  
486 species had inducible chromosomal AmpC genes and showed resistance to the WHO second-line  
487 cephalosporin regimen (cefotaxime/ceftriaxone) as well as to flomoxef alone. It is well known  
488 from the literature that derepressed mutants can be selected in AmpC inducible species during  
489 therapy with these agents and lead to the development of resistance and clinical failure, especially  
490 in invasive infection caused by *Enterobacter cloacae* complex [43].

491 Although the study recruited over 3200 neonates, the limitations of this study mainly relate to  
492 the relatively small number of samples obtained, especially from sites where lower number of  
493 patients were enrolled. Besides differences in the prevalence and distribution of neonatal sepsis  
494 pathogens, variation in blood culture positivity rates between centers was also observed [6],  
495 possibly indicating differences in the collection and/or performance of microbiological methods  
496 used locally. The majority of neonatal units participating in this study were from tertiary hospitals  
497 in urban areas, so the burden of AMR may not be representative for district hospitals. These  
498 elements represent an important bias in most AMR studies in low-resource settings, where the  
499 need for high-quality microbiology means that certain settings may be overrepresented.



500

501 **Conclusion**

502 The NeoOBS study showed wide variety of bacterial species as a cause of neonatal sepsis, many  
503 of which carried multiple resistance genes. Among Gram-negative isolates, *K. pneumoniae* was  
504 the most predominant species widely distributed among the sites. Many of the isolates from our  
505 study were resistant to the first and second line WHO treatments, mostly because of the very  
506 frequent occurrence of ESBLs. New agents that can target these pathogens are urgently needed.  
507 The three novel antibiotic combinations, fosfomycin-flomoxef, fosfomycin-amikacin and  
508 flomoxef-fosfomycin showed high activity especially against ESBL producing *E. coli* and  
509 *Klebsiella pneumoniae* isolates. Our study supports the evaluation of these combinations in the  
510 NeoSep1 trial, for treatment of neonatal sepsis.

511

## 512 References

- 513 1. Antimicrobial Resistance, C., *Global burden of bacterial antimicrobial resistance in*  
514 *2019: a systematic analysis*. Lancet, 2022. **399**(10325): p. 629-655.
- 515 2. Organization, W.H., *Global report on the epidemiology and burden of sepsis: current*  
516 *evidence, identifying gaps and future directions*. 2020.
- 517 3. Gan, M.Y., et al., *Contemporary Trends in Global Mortality of Sepsis Among Young*  
518 *Infants Less Than 90 Days: A Systematic Review and Meta-Analysis*. Front Pediatr, 2022.  
519 **10**: p. 890767.
- 520 4. Sands, K., et al., *Characterization of antimicrobial-resistant Gram-negative bacteria that*  
521 *cause neonatal sepsis in seven low- and middle-income countries*. Nat Microbiol, 2021.  
522 **6**(4): p. 512-523.
- 523 5. Investigators of the Delhi Neonatal Infection Study, c., *Characterisation and*  
524 *antimicrobial resistance of sepsis pathogens in neonates born in tertiary care centres in*  
525 *Delhi, India: a cohort study*. Lancet Glob Health, 2016. **4**(10): p. e752-60.
- 526 6. Russell, N.J., et al., *Patterns of antibiotic use, pathogens, and prediction of mortality in*  
527 *hospitalized neonates and young infants with sepsis: A global neonatal sepsis*  
528 *observational cohort study (NeoOBS)*. PLoS Med, 2023. **20**(6): p. e1004179.
- 529 7. Okomo, U., et al., *Aetiology of invasive bacterial infection and antimicrobial resistance*  
530 *in neonates in sub-Saharan Africa: a systematic review and meta-analysis in line with*  
531 *the STROBE-NI reporting guidelines*. Lancet Infect Dis, 2019. **19**(11): p. 1219-1234.
- 532 8. Ullah, O., et al., *Antibiotic Sensitivity pattern of Bacterial Isolates of Neonatal Septicemia*  
533 *in Peshawar, Pakistan*. Arch Iran Med, 2016. **19**(12): p. 866-869.
- 534 9. Hamer, D.H., et al., *Etiology of bacteremia in young infants in six countries*. Pediatr Infect  
535 Dis J, 2015. **34**(1): p. e1-8.
- 536 10. Dramowski, A., A. Madide, and A. Bekker, *Neonatal nosocomial bloodstream infections*  
537 *at a referral hospital in a middle-income country: burden, pathogens, antimicrobial*  
538 *resistance and mortality*. Paediatr Int Child Health, 2015. **35**(3): p. 265-72.
- 539 11. Fuchs, A., et al., *Reviewing the WHO guidelines for antibiotic use for sepsis in neonates*  
540 *and children*. Paediatr Int Child Health, 2018. **38**(sup1): p. S3-S15.
- 541 12. Labi, A.K., et al., *Neonatal bloodstream infections in a Ghanaian Tertiary Hospital: Are*  
542 *the current antibiotic recommendations adequate?* BMC Infect Dis, 2016. **16**(1): p. 598.
- 543 13. Bandyopadhyay, T., et al., *Distribution, antimicrobial resistance and predictors of*  
544 *mortality in neonatal sepsis*. J Neonatal Perinatal Med, 2018. **11**(2): p. 145-153.
- 545 14. Jajoo, M., et al., *Alarming rates of antimicrobial resistance and fungal sepsis in outborn*  
546 *neonates in North India*. PLoS One, 2018. **13**(6): p. e0180705.
- 547 15. Yadav, N.S., et al., *Bacteriological profile of neonatal sepsis and antibiotic susceptibility*  
548 *pattern of isolates admitted at Kanti Children's Hospital, Kathmandu, Nepal*. BMC Res  
549 Notes, 2018. **11**(1): p. 301.
- 550 16. Pokhrel, B., et al., *Bacteriological profile and antibiotic susceptibility of neonatal sepsis*  
551 *in neonatal intensive care unit of a tertiary hospital in Nepal*. BMC Pediatr, 2018. **18**(1):  
552 p. 208.
- 553 17. Chaurasia, S., et al., *Neonatal sepsis in South Asia: huge burden and spiralling*  
554 *antimicrobial resistance*. BMJ, 2019. **364**: p. k5314.
- 555 18. Riddell, A., et al., *Challenges in the Implementation of the NeoOBS Study, a Global*  
556 *Pragmatic Observational Cohort Study, to Investigate the Aetiology and Management of*  
557 *Neonatal Sepsis in the Hospital Setting*. Antibiotics (Basel), 2023. **12**(5).
- 558 19. Darlow, C.A., et al., *Potential Antibiotics for the Treatment of Neonatal Sepsis Caused*  
559 *by Multidrug-Resistant Bacteria*. Paediatr Drugs, 2021. **23**(5): p. 465-484.

- 560 20. Darlow, C.A., et al., *Amikacin Combined with Fosfomycin for Treatment of Neonatal*  
561 *Sepsis in the Setting of Highly Prevalent Antimicrobial Resistance*. *Antimicrob Agents*  
562 *Chemother*, 2021. **65**(7): p. e0029321.
- 563 21. Darlow, C.A., et al., *Flomoxef and fosfomycin in combination for the treatment of*  
564 *neonatal sepsis in the setting of highly prevalent antimicrobial resistance*. *J Antimicrob*  
565 *Chemother*, 2022. **77**(5): p. 1334-1343.
- 566 22. Darlow, C.A. and W. Hope, *Flomoxef for neonates: extending options for treatment of*  
567 *neonatal sepsis caused by ESBL-producing Enterobacterales*. *J Antimicrob Chemother*,  
568 2022. **77**(3): p. 711-718.
- 569 23. Xavier, B.B., et al., *BacPipe: A Rapid, User-Friendly Whole-Genome Sequencing*  
570 *Pipeline for Clinical Diagnostic Bacteriology*. *iScience*, 2020. **23**(1): p. 100769.
- 571 24. Parks, D.H., et al., *CheckM: assessing the quality of microbial genomes recovered from*  
572 *isolates, single cells, and metagenomes*. *Genome Res*, 2015. **25**(7): p. 1043-55.
- 573 25. Wirth, T., et al., *Sex and virulence in Escherichia coli: an evolutionary perspective*. *Mol*  
574 *Microbiol*, 2006. **60**(5): p. 1136-51.
- 575 26. Diancourt, L., et al., *Multilocus sequence typing of Klebsiella pneumoniae nosocomial*  
576 *isolates*. *J Clin Microbiol*, 2005. **43**(8): p. 4178-82.
- 577 27. Jolley, K.A. and M.C. Maiden, *BIGSdb: Scalable analysis of bacterial genome variation*  
578 *at the population level*. *BMC Bioinformatics*, 2010. **11**: p. 595.
- 579 28. Diancourt, L., et al., *The population structure of Acinetobacter baumannii: expanding*  
580 *multiresistant clones from an ancestral susceptible genetic pool*. *PLoS One*, 2010. **5**(4):  
581 p. e10034.
- 582 29. Fitzpatrick, M.A., E.A. Ozer, and A.R. Hauser, *Utility of Whole-Genome Sequencing in*  
583 *Characterizing Acinetobacter Epidemiology and Analyzing Hospital Outbreaks*. *J Clin*  
584 *Microbiol*, 2016. **54**(3): p. 593-612.
- 585 30. Kluytmans-van den Bergh, M.F., et al., *Whole-Genome Multilocus Sequence Typing of*  
586 *Extended-Spectrum-Beta-Lactamase-Producing Enterobacteriaceae*. *J Clin Microbiol*,  
587 2016. **54**(12): p. 2919-2927.
- 588 31. Zhou, Z., et al., *GrapeTree: visualization of core genomic relationships among 100,000*  
589 *bacterial pathogens*. *Genome Res*, 2018. **28**(9): p. 1395-1404.
- 590 32. Lee, C.H., et al., *Relation between flomoxef minimum inhibitory concentrations and*  
591 *clinical outcomes of patients treated with flomoxef for Enterobacteriaceae bacteremia*.  
592 *Infect Drug Resist*, 2018. **11**: p. 2471-2480.
- 593 33. Wen, S.C.H., et al., *Gram-negative neonatal sepsis in low- and lower-middle-income*  
594 *countries and WHO empirical antibiotic recommendations: A systematic review and*  
595 *meta-analysis*. *PLoS Med*, 2021. **18**(9): p. e1003787.
- 596 34. van Staaden, H., C. Hendricks, and K. Spicer, *Bacteraemia and antibiotic sensitivity in a*  
597 *tertiary neonatal intensive care unit*. *S Afr J Infect Dis*, 2021. **36**(1): p. 195.
- 598 35. Pillay, D., et al., *Neonatal sepsis in a tertiary unit in South Africa*. *BMC Infect Dis*, 2021.  
599 **21**(1): p. 225.
- 600 36. Mulinganya, G.M., et al., *Etiology of Early-Onset Neonatal Sepsis and Antibiotic*  
601 *Resistance in Bukavu, Democratic Republic of the Congo*. *Clin Infect Dis*, 2021. **73**(4):  
602 p. e976-e980.
- 603 37. Safavi, M., et al., *Global genotype distribution of human clinical isolates of New Delhi*  
604 *metallo-beta-lactamase-producing Klebsiella pneumoniae; A systematic review*. *J Glob*  
605 *Antimicrob Resist*, 2020. **23**: p. 420-429.
- 606 38. Mbelle, N.M., et al., *Pathogenomics and Evolutionary Epidemiology of Multi-Drug*  
607 *Resistant Clinical Klebsiella pneumoniae Isolated from Pretoria, South Africa*. *Sci Rep*,  
608 2020. **10**(1): p. 1232.

- 609 39. Osei Sekyere, J. and M.A. Reta, *Genomic and Resistance Epidemiology of Gram-*  
610 *Negative Bacteria in Africa: a Systematic Review and Phylogenomic Analyses from a*  
611 *One Health Perspective*. mSystems, 2020. **5**(6).
- 612 40. David, S., et al., *Integrated chromosomal and plasmid sequence analyses reveal diverse*  
613 *modes of carbapenemase gene spread among Klebsiella pneumoniae*. Proc Natl Acad Sci  
614 U S A, 2020. **117**(40): p. 25043-25054.
- 615 41. Pitout, J.D.D., et al., *Escherichia coli ST1193: Following in the Footsteps of E. coli*  
616 *ST131*. Antimicrob Agents Chemother, 2022. **66**(7): p. e0051122.
- 617 42. Medioli, F., et al., *Is It Possible to Eradicate Carbapenem-Resistant Acinetobacter*  
618 *baumannii (CRAB) from Endemic Hospitals?* Antibiotics (Basel), 2022. **11**(8).
- 619 43. Meini, S., et al., *AmpC beta-lactamase-producing Enterobacterales: what a clinician*  
620 *should know*. Infection, 2019. **47**(3): p. 363-375.
- 621
